# Supplementary material
Source: publisher figshare collection journal article supplement (https://geolsoc.figshare.com/ndownloader/files/25616443)
Supplement: Supplementary file 1 [file 25616443]

# Appendix: Geology of the Northern Caribbean and the Greater Antillean Arc

This map is a compilation of many years work to produce a comprehensive collection of the structural and hydrocarbon elements of this region. The data displayed comes from a multitude of sources ranging from academia, industry, Government, and independent research. Below is a list of the references categorised by type. We hope to have included every reference used but apologise if any have been missed.

## Surface Geology

As this Map is compiled from multiple references, there is a line on the map which denotes the borders at which point the geology changes reference.

Servicio Geológico Mexicano 2006 1:500,000 Geological Map. <https://www.sgm.gob.mx/Gobmx/en/About_SGM/Geology.html>

Campeche, Quintana Roo y Yucatán, 2007. Calleja-Moctezuma, A., Sánchez-Rojas, L.E., and Barajas-Nigoche, L.D. (Map coordinators). Carta Geológica-Minera Estatal Campeche, Quintana Roo, Yucatán, Esc. 1:500,000. Servicio Geológico Mexicano (antes Consejo de Recursos Minerales) Pachuca, Hidalgo, Mexico.

French, C.D. and Schenk, C.J., 2004, Map showing geology, oil and gas fields, and geologic provinces of the Caribbean Region: U.S. Geological Survey Open-File Report 97-470-K, <https://doi.org/10.3133/ofr97470K>.

**Cuba:** The Surface Geology for onshore Cuba is digitised from both 1:500,000 and 1:250,000 state geology maps from the Ministerio de la Industria Basica: Perez Othon, J. and Yarmoliuk, V.A., 1985. Mapa Geologico de la Republica de Cuba, 1:500,000.Instituto de Geologia y Paleontologia, 1988. Mapa Geologico de Cuba, 1:250,000.

**Jamaica:** The Surface Geology for onshore Jamaica is digitised from a 1:250,000 state geology map from the Geological Survey of Jamaica:*Tolworth, 1958 (1979). Jamaica Geology, 1:250,000.*

**Dominican Republic:** The Surface Geology for onshore Dominican Republic was acquired from OneGeology at a 1:250,000 scale: *Tapia, S.M., 2005. IGME SGN EN GEOLOGY, DOM SGN 1:250k.*Map service URL: <http://mapas.igme.es/gis/services/PSysmin/IGME_SGN_EN_Geology/MapServer/WMSServer>

**Haiti:** The Surface Geology for onshore Haiti was acquired from HaitiData. <http://haitidata.org>

## Cultural Data

Maritime Boundaries: CC BY 4.0 Flanders 2019 Maritime Boundaries Geodatabase: Maritime Boundaries and Exclusive Economic Zones (200NM), version 11. Available online at http://www.marineregions.org/. https://doi.org/10.14284/386. No changes have been made to the original data file

Cities: World Cities, ESRI feature service, source credits Esri, CIA World factbook, GMI, NIMA, Times Atlas 10th.

GEBCO, 2015. The GEBCO_2014 Grid, version 20150318. Available online at <http://www.gebco.net>.

DSDP and ODP expedition locations have been included (where possible). The original database can be downloaded from <http://iodp.tamu.edu/scienceops/maps.html>

Water Bodies: French, C.D. and Schenk, C.J., 2004, Map showing geology, oil and gas fields, and geologic provinces of the Caribbean Region: U.S. Geological Survey Open-File Report 97-470-K, <https://doi.org/10.3133/ofr97470K>

Oil Fields: The oil field shapefile has been generated from multiple sources of varying accuracy and publication date so has its limitation in terms of completeness. References include

Herrera, J.E.G., Morán, O.R., León, J.H., Gonzalez, S.G., Proenza, R.T., Domínguez, M.B., Echevarría, C.M., Despaigne, D.G., and del Toro, J.A. 2013. Aproximación a un modelo estático en el Prospecto Guanabo Sur. V CONVENCIÓN CUBANA DE CIENCIAS DE LA TIERRA, GEOCIENCIAS´2013 Memorias en CD-Rom, La Habana, 1 al 5 de abril de 2013. ISSN-2307-499X

Melbana Energy, 2017. Melbana Corporate Presentation Feb 2017. Presentation [Accessed Online: February 2017].

MEO Australia 2015. Cuba – Block 9 PSC, Flyer, MEO Australia Limited, 1p.

Dominican Republic Wells: Were downloaded from the Base Nacional De Datos De Hidrocarburos website at <http://bndh.gob.do/>

Wells: Complete well data bases for the remaining regions of on this map were not available so have been collected from the references listed below. The wells shown do not provide a complete coverage and have been digitised in a variety of manors from lat\longs to rectified maps so location and accuracy varies. References include:

Ahmad, S.S. 2014. Paleogeographic reconstruction of the northern Caribbean region from Late Cretaceous to the Recent. Master’s Thesis, Faculty of Science and Technology, University of Stavanger, Norway.

Ananev, V.V., Verzhbitskiy, V.E., Obukhov, A.N., Borisov, D.V., and Nortsev, G.V. 2014. Geology and Petroleum Potential of the Gulf of Mexico, Cuba. SPE Russian Oil and Gas Exploration Technical Conference and Exhibition, Russia, Presentation.

Ball, MM, Martin, RG, Bock, WD, Sylwester, RE, Bowles, RM, Taylor, D, Coward, EL, Dodd, JE, and Gilbert, L 1985, Seismic structure and stratigraphy of northern edge of Bahaman-Cuban collision zone. , AAPG Bulletin, vol. 69, no. 8, pp. 1275-1294.

Batista-Rodríguez, J.A., Pérez-Flores, M.A., Blanco-Moreno, J., and Camacho-Ortegón, L.F. 2014. Structural deformation in central Cuba and implications for the petroleum system: new insights from 3D inversion of gravity data. Revista Mexicana De Ciencias Geológicas, v. 31, núm. 3, 2014, p. 325-339.

Carvajal-Arenas, L.C. and Mann, P., 2018. Western Caribbean intraplate deformation: defining a continuous and active microplate boundary along the San Andres Rift and Hess Escarpment fault zone, Colombian Caribbean Sea. Bulletin American Association of Petroleum Geologists, 102, 1523-1563.

Cruz, R.A. 2011. Caracterización geológica del subsuelo en el campo petrolero Canasí. Franja Norte de Crudos Pesados de Cuba. Trabajo de Diploma, Universidad de Pinar del Río Hermanos Saíz Montes de Oca.

Cruz-Orosa, I., 2012. Las Cuencas Sinorogenicas Como Registro de la Evolucion del Orogeno Cubano: Implicaciones Para la Exploracion de Hidrocarburos, Universitat de Barcelona, Thesis, 218p.

Del Rey, D.B and Bustamante, L.S.B. 2009. Estudio sedimentológico y paleontológico de la formación Vía Blanca en los pozos del Area Yumurí. Extended Abstract, II Congreso Cubano de Petroleo y Gas, PETROBAS’2009, 16-20 de Marzo, La Habana, Cuba, p 148-157.

Epstein, S.A. and Clark, D., 2009. Hydrocarbon Potential of the Mesozoic Carbonates of the Bahamas, Carbonates and Evaporites, 24, 2, 97-138.

Erlich, R., and Inniss, F., 2014. Exploration for Cretaceous Deep-Water Reservoirs in the Circum-Caribbean Region: Historical Review and Expectations for the Future, AAPG Search and Discovery Article #30353.

Fernandez, M.D.J.V. 2011. Evidencias Gasopetrolíferas Detectadas En El Pozo Picanes -1x. III Congreso Cubano de Petroleo Y Gas (Petrogas´2011), Cuarta Convención Cubana De Ciencias De La Tierra, Geociencias´2011. Memorias en CD-Rom, La Habana, 4 al 8 de abril de 2011.

Frost, S.H., Harbour, J.L., Beach, D.K., Realini, M.J., and Harris, P.M. 1983. Oligocene Reef Tract Development: Southwestern Puerto Rico, Sedmenta IX, 144.

Gestel, J.P., Mann, P., Grindlay, N.R., Dolan, J.F., 1999. Three-phase tectonic evolution of the northern margin of Puerto Rico as inferred from an integration of seismic reflection, well, and outcrop data. Marine Geology, Volume 161, Issues 2–4,p pages 257-286.

Hernandez, M.C.R., and Betancourt, J.G.L.P. 2013. Argumentos Geofisicos Acerca Del Margen Continental En La Cuenca Central De Cuba. In: V Convención Cubana De Ciencias De La Tierra, Geociencias 2013, Memorias en CD-Rom, La Habana, 1 al 5 de abril de 2013. ISSN 2307-499X.

Iturralde-Vinent, M.A. 2014. Estratigrafía De Las Cuencas Sinorogénicas Del Campaniano Tardío Aldaniano Desarrolladas Sobre Rocas De Arco Volcánico Y Retroarco En Cuba, Anuario de la Sociedad Cubana de Geología, No 2, 2014, págs. 27- 50, ISSN 2310-0060.

Larue, D, & Warner, A 1991, 'Sedimentary basins of the NE Caribbean Plate boundary zone and their petroleum potential', Journal of Petroleum Geology, 14, 3, pp. 275-290

Lidz, B.H. Reich, C.D., Shinn, E.A. 2007. Systematic Mapping of Bedrock and Habitats along the Florida Reef Tract – Central Key Largo to Halfmoon Shoal (Gulf of Mexico). USGS Professional Paper, 1751.

Mann, P., Hernaiz, P.P, and Ramirez, W. 2008. Stratigraphy, tectonics and subsurface petroleum of the Ocoa, Azua, and Enriqullo Basins, Dominican Republic. 18th Caribbean Geological Conference, 2-Day Fieldtrip Guide.

Melbana Energy, 2017. Melbana Corporate Presentation Feb 2017. Presentation [Accessed Online: February 2017].

MEO Australia 2016. Good Oil Conference Presentation, September 2016. Accessed online November 2016.

Ramirez, G., and Dames, G.F., 2011. Competent Person’s Report, Bahamas Petroleum Company Plc, Ryder Scott Company Petroleum Consultants, 30th June 2011, 39p.

Sagres Energy, 2011. Jamaica: Prospects in a Renewed Hydrocarbon Play Shallow Water, Pedro Bank. APPEX 2011 Presentation.

Sanchez, J., Mann, P., and Emmet, P.A., 2015. Late Cretaceous-Cenozoic tectonic transition from collision to transtension, Honduran Borderlands and Nicaraguan Rise, NW Caribbean Plate boundary, IN: Nemcok, M., Rybar, S., Sinha, S.T., Hermeston, S.A., and Ledvenyiova, L. (eds) Transform Margins: Development, Controls and Petroleum Systems, Geological Society of London Special Publications, 431, 205-217.

Toledo, R.C. 2009. Geomorfologia regionalcon con objetivo petrolero. Surelacion con la tectonica de cizalla en el area de Cuenca Central de Cuba. Extended Abstract, II Congreso Cubano de Petroleo y Gas, PETROBAS’2009, 16-20 de Marzo, La Habana, Cuba, p 178-190.

Wassall, H.W. 1956. Salt Section Discovered in Northern Coast Test. Cuban Kewanee Oil Company

Blocks: The blocks shapefile has been generated from multiple sources of varying accuracy and publication date so has its limitation in terms of completeness. References include

Bahamas Petroleum Company PLC, 2015. A Global Scale Exploration Opportunity: Shareholder Meeting, London. [Accessed online: December 2015].

Cuba Oil & Gas Summit, 2016. Agenda: Cuba Oil & Gas 2017 Summit. Brochure.

Cuba Oil & Gas Summit 2018. Cuba Oil & Gas Summit 2018. Brochure.

GeoEX, 2019. Nicaragua Opportunities. News Article. [Accesses online: September 2020] https://www.geoexltd.com/news/nicaragua-opportunities/

Reyes, A., 2019. Dominican Republic 1st Licencing Round. Introduction to the Round. [Accessed online: September 2020] <http://roundsdr.gob.do/wp-content/uploads/2019/07/1-Intro-to-DR-20190709-v10.pdf>

Petroleum Corporation of Jamaica 2019. PCJ Block Map. [Accessed online: September 2020]

## Geology

### Seeps:

### Brown, M. 2013. Exploration Driving Value. BG Group Exploration Update. Accessed online September 2013, no longer available.

### Cala, E.L., Meisoso, C.S., Delgado, D.G., López, O.D., and Proenza, R.T. 2009. Rocas de cuencas profundas e hidrocarburos en el norte de las provincias las Tunas y holguín. Extended Abstract, II Congreso Cubano de Petroleo y Gas, PETROBAS’2009, 16-20 de Marzo, La Habana, Cuba, p 248-264.

Carvajal-Arenas, L.C. and Mann, P., 2018. Western Caribbean intraplate deformation: defining a continuous and active microplate boundary along the San Andres Rift and Hess Escarpment fault zone, Colombian Caribbean Sea. Bulletin American Association of Petroleum Geologists, 102, 1523-1563.

Mann, P., and Lawrence, S., 1991. Petroleum potential of southern Hispaniola: Journal of Petroleum Geology, 14, 291-308

Pardo, G., 2009. The Geology of Cuba. AAPG Studies in Geology #58, 73p.

Sagres Energy, 2011. Jamaica: Prospects in a Renewed Hydrocarbon Play Shallow Water, Pedro Bank. APPEX 2011 Presentation.

### Slicks:

CUPET, 2015. Hydrocarbon Potential of Cuban Exclusive Economic Zone in the Gulf of Mexico (CEEZ-GoM), Brochure – Executive Summary. May 2015.

Jablonski, D., Westlake, S., and Gumley, G.M. 2010. Offshore Jamaica – A new Frontier? Unmasking the Potential of the Walton Basin. Poster Presentation, AAPG 2010 Annual Convention & Exhibition, New Orleans, Louisiana, USA. http://www.searchanddiscovery.com/pdfz/abstracts/pdf/2010/annual/abstracts/ndx_jablonski.pdf.html

### **Volcanics:**

### Serrano, L., Ferrari, L., Martínez, M.L., Petrone, C.M., and Jaramillo, C., 2011. An integrative geologic, geochronologic and geochemical study of Gorgona Island, Colombia: Implications for the formation of the Caribbean Large Igneous Province, Earth and Planetary Science Letters, Volume 309, Issues 3–4, Pages 324-336.

### **Folds:**

Bahamas Petroleum Company PLC, 2011a. The Bahamas: January Investor Presentation [Offline].

Calais, E., and Lepinay, B.M.D. 1991. From transtension to transpression along the northern Caribbean plate boundary off Cuba: implications for the recent motion of the Caribbean plate. Tectonophysics, 181, 329-350.

Carbó-Gorosabel and 21 other authors. 2015. New survey explores the Northern Hispaniola Offshore Margin. 77th EAGE Conference and Exhibition, 1-4 June IFEMA Conference Madrid. DOI: 10.3997/2214-4609.201412750

Gestel, J.P., Mann, P., Grindlay, N.R., Dolan, J.F., 1999. Three-phase tectonic evolution of the northern margin of Puerto Rico as inferred from an integration of seismic reflection, well, and outcrop data. Marine Geology, Volume 161, Issues 2–4,p pages 257-286.

Kula, D., 2014. Neotectonics on the Edge of the Cuban Fold and Thrust Belt. Open Access Theses. Paper 498.

Mann, P., and Lawrence, S., 1991. Petroleum potential of southern Hispaniola: Journal of Petroleum Geology, 14, 291-308.

### **Faults:**

### Bahamas Petroleum Company PLC, 2010. The Bahamas: August Investor Presentation [Offline].

### Barat, F., Mercier de Lépinay, B., Sosson, M., Müller, C., Baumgartner, P.O., Baumgartner-Mora, C., 2014. Transition from the Farallon Plate subduction to the collision between South and Central America: Geological evolution of the Panama Isthmus, Tectonophysics, Volume 622, Pages 145-167.

Benford, B., DeMets, C., Tikoff, B., Williams, P., Brown, L. and Wiggins‐Grandison, M. (2012), Seismic hazard along the southern boundary of the Gônave microplate: block modelling of GPS velocities from Jamaica and nearby islands, northern Caribbean. Geophysical Journal International, 190: 59-74. doi:10.1111/j.1365-246X.2012.05493.x

Calais, E., and Lepinay, B.M.D. 1991. From transtension to transpression along the northern Caribbean plate boundary off Cuba: implications for the recent motion of the Caribbean plate. Tectonophysics, 181, 329-350.

Carbó-Gorosabel and 21 other authors. 2015. New survey explores the Northern Hispaniola Offshore Margin. 77th EAGE Conference and Exhibition, 1-4 June IFEMA Conference Madrid. DOI: 10.3997/2214-4609.201412750

Carvajal-Arenas, L.C. and Mann, P., 2015. Petroleum System Analysis of the Nicaraguan Rise and Columbian Basin: A Regional Overview from Seismic and Well Data, AAPG Search and Discovery Article #10736.

Carvajal-Arenas, L.C. and Mann, P., 2018. Western Caribbean intraplate deformation: defining a continuous and active microplate boundary along the San Andres Rift and Hess Escarpment fault zone, Colombian Caribbean Sea. Bulletin American Association of Petroleum Geologists, 102, 1523-1563.

Corbeau, J., Rolandone, F., Leroy, S., Mercier de Lépinay, b., Meyer, B., Ellouz-Zimmermann, N., and Momplisir, R., 2016. The northern Caribbean plate boundary in the Jamaica Passage: structure and seismic stratigraphy. Tectonophysics, 675, pp.209-226. <10.1016/j.tecto.2016.03.022>. <hal-01302905>

Cruz-Orosa, I., 2012. Las Cuencas Sinorogenicas Como Registro de la Evolucion del Orogeno Cubano: Implicaciones Para la Exploracion de Hidrocarburos, Universitat de Barcelona, Thesis, 218p.

CUPET, 2015. Hydrocarbon Potential of Cuban Exclusive Economic Zone in the Gulf of Mexico (CEEZ-GoM), CUPET, Safe Seas – Clean Seas, One Gulf and Caribbean Offshore Environment Drilling Symposium, 28th October 2015.

Garcia-Casco, A, Proenza, JA, & Iturralde-Vinent, MA 2011, 'Subduction zones of the Caribbean; the sedimentary, magmatic, metamorphic and ore-deposit records; UNESCO/IUGS IGCP project 546 subduction zones of the Caribbean',Geologica Acta, vol. 9, no. 3-4, pp. 217-224.

Gorosabel-Araus, J.M., Granja-Bruña, J.L. et al. 2020. New constraints on the tectonosedimentary evolution of the offshore San Pedro Basin (southeastern Dominican Republic): implications for its hydrocarbon potential. The Geological Society of London, Special Publications, 504, <https://doi.org/10.1144/SP504-2019-224>

Iturralde-Vinent, M.A. 2007. Geology of Western Cuba. Field Guide: Field-Workshop of Caribbean Geology, Sociedad Cubana de Geologia, La Habana, March 2007.

James, K. 2007. Structural geology: From local elements to regional synthesis. In: Bundschuh, J. and G. E. Alvarado. (eds) CENTRAL AMERICA: GEOLOGY, RESOURCES AND HAZARDS; Geology, Resources and Hazards (pp.277-321)

Jimenez, A., 2002. RD_250K_DGM_Geology_EN. 1:250k Geological Map of Dominican Republic was elaborated with the cooperation of the BGR (Germany) in 1991. The map contains combined bedrock and superficial deposits. Geologic Units are represented in one layer and includes the unit description and two chonostratigraphic units: System and Series. An additional layer of faults and geological contacts is also provided.

Kula, D., 2014. Neotectonics on the Edge of the Cuban Fold and Thrust Belt. Open Access Theses. Paper 498

Larue, D, & Warner, A 1991, 'Sedimentary basins of the NE Caribbean Plate boundary zone and their petroleum potential', Journal of Petroleum Geology, 14, 3, pp. 275-290

Leroy, S., de Lépinay, B.M., Mauffret, A., Pubellier, M. 1996. Structural and Tectonic Evolution of the Eastern Cayman Trough (Caribbean Sea) From Seismic Reflection Data. AAPG Bulletin, V. 80, No. 2 (February 1996), P. 222–247.

Leroy, S., Ellouz-Zimmermann, N., Corbeau, J., Rolandone, F., Mercier de Lepinay, B et al. 2015 Segmentation and kinematics of the North America-Caribbean plate boundary offshore Hispaniola. Terra Nova, Wiley-Blackwell, 2015, 27 (6), pp.467-478. <https://hal.archives-ouvertes.fr/hal-01213955>

Mann, P., and Lawrence, S., 1991. Petroleum potential of southern Hispaniola: Journal of Petroleum Geology, 14, 291-308.

MDOIL Limited, 2009. Petroleum Prospectivity of Jamaica: Data for 2nd Official Round. Brochure.

Molina Garza, R.S., van Hinsbergen, D.J.J., Boschman, L.M., Rogers, R.D., and Ganerød, M., 2019. Large-scale rotations of the Chortis Block (Honduras) at the southern termination of the Laramide flat slab, Tectonophysics, 760, 36-57.

Petroleum Corporation of Jamaica 2017a. Oil and Gas Exploration: Source Rocks/Hydrocarbon Charge. Accessed online April 2017.

Pérez-Estaún, A., Hernaiz Huerta, P.P., Lopera, E., Joubert, M., Escuder-Viruete, J., Díaz de Neira, J. A., Monthel, J., García-Senz, J., Ubrien, P., Contreras, F., Bernárdez, E., Stein, G., Deschamps, I., García-Lobón, J.L., Ayala, C., 2007. Geología de la República Dominicana: de la construcción de arco-isla a la colisión arco-continente. Boletín Geológico y Minero. 118. 157-174.

Pindell, J.L., and Kennan, L., 2009. Tectonic evolution of the Gulf of Mexico, Caribbean and northern South America in the mantle reference frame: an update. In: James, K., Lorente, M. A. & Pindell, J. (eds) The geology and evolution of the region between North and South America, Geological Society of London, Special Publication. 28, 1-55, 1 January 2009, https://doi.org/10.1144/SP328.1

Rogers, R.D., Mann, P. and Emmet, P.A. 2007a. Tectonic terranes of the Chortis block based on integration of regional aeromagnetic and geological data. In: Mann, P. (ed.) Geologic and tectonic development of the Caribbean plate in northern Central America, Geological Society of America Special Paper, 428, 65–88.

Rogers, R. D., Mann, P., Emmet, P. A. and Venable, M. E. 2007b. Colon fold belt of Honduras: Evidence for Late Cretaceous collision between the continental Chortís block and intra-oceanic Caribbean arc. In: Mann, P. (ed.) Geologic and tectonic development of the Caribbean Plate Boundary in northern Central America, Geological Society of America Special Paper, 428, 129–149.

Salas, L.E.F., Betancourt, A.B., Acosta, J.P., Echemendia, F.P. 2014. Prospección De Arena Aluvial En Sistemas Fluviales De Los Ríos Jobabo Y Tana Con Utilización De Métodos Geólogo – Geofísicos. Anuario de la Sociedad Cubana de Geología, No 2, págs. 79 - 90, ISSN 2310-0060

Sanchez, J., Mann, P., and Emmet, P.A., 2015. Late Cretaceous-Cenozoic tectonic transition from collison to transtension, Honduran Borderlands and Nicaraguan Rise, NW Caribbean Plate boundary, IN: Nemcok, M., Rybar, S., Sinha, S.T., Hermeston, S.A., and Ledvenyiova, L. (eds) Transform Margins: Development, Controls and Petroleum Systems, Geological Society of London, Special Publications, 431, 205-217.

Styron, R., Garcia, J., & Marco. P., 2020. CCAF-DB: the Caribbean and Central American active fault database. Natural Hazards and Earth System Sciences. 20. 831-857. https://doi.org/10.5194/nhess-20-831-2020, 2020

United Oil and Gas 2018. Corporate Presentation July 2018. Accessed online August 2018. https://www.uogplc.com/wp-content/uploads/2018/07/UOG-Investor-Presentation-25-July-2018-Website-Version-Final.pdf

### **Rifts\Depocentres:**

### Brandes, C, Winsemann, J. From incipient island arc to doubly‐vergent orogen: A review of geodynamic models and sedimentary basin‐fills of southern Central America. Island Arc. 2018; 27:e12255. <https://doi.org/10.1111/iar.12255>

Cruz-Orosa, I., 2012. Las Cuencas Sinorogenicas Como Registro de la Evolucion del Orogeno Cubano: Implicaciones Para la Exploracion de Hidrocarburos, Universitat de Barcelona, Thesis, 218p.

Mann, P. and Burke, K. 1990. Transverse intra-arc rifting; Palaeogene Wagwater Belt, Jamaica: Marine and Petroleum Geology, v. 7, p. 410-427.

MDOIL Limited, 2009. Petroleum Prospectivity of Jamaica: Data for 2nd Official Round. Brochure.

Vázquez-Taset, M., Sàbat, F., Cabello,P., Cruz-Orosa, I., Ramos, E., 2020. Cenozoic tectonostratigraphic evolution of the strike-slip Cauto-Guacanayabo Basin, Eastern Cuba, Journal of South American Earth Sciences, Volume 100,

### **Salt Structures:**

*Salt structures have been digitised from a number of publications and also our own interpretation from analysing the high resolution bathymetry.*

### **Carbonate Bank:**

Bunge, R., Yusri, Y., Miller, S.L., Ferro, E., and Bova, J., 2017. Seismic Carbonate Reservoir Prediction and Drilling Results, Offshore Nicaragua, Caribbean Sea. Search and Discovery Article #10919.

Carbó-Gorosabel and 21 other authors. 2015. New survey explores the Northern Hispaniola Offshore Margin. 77th EAGE Conference and Exhibition, 1-4 June IFEMA Conference Madrid. DOI: 10.3997/2214-4609.201412750

Petroleum Corporation of Jamaica 2017. Oil and Gas Exploration: Source Rocks/Hydrocarbon Charge. Accessed online April 2017.

Torrado, L., Carvajal-Arenas, L.C., Sanchez, J., Mann, P., and Silva-Tamayo, J.C., 2019. Late Cretaceous-Cenozoic sequence stratigraphic and paleogeographic controls on petroleum system elements of the Nicaraguan platform, western Caribbean Sea, AAPG Bulletin, 103, 8, 1925-1962.

### **Basement High:**

MDOIL Limited, 2009. Petroleum Prospectivity of Jamaica: Data for 2nd Official Round. Brochure.

### **Antillean Arc Progression:**

Pindell, J.L. and Barrett, S.F. 1990. Geological evolution of the Caribbean region; a plate tectonic perspective. In: Dengo, G. and Case, J.E. (eds) The Caribbean Region. Geological Society of America, Decade of North American Geology, H, 405–432.

Pindell, J. L. and Kennan, L. 2001. Processes and events in the terrane assembly of Trinidad and eastern Venezuela. In: Fillon, R. H., Rosen, N. C., Weimer, P., Lowrie, A., Pettingill, H., Phair, R. H., Roberts, H. H. & Van Hoorn, B. (eds) Transactions of the 21st GCSSEPM Annual Bob F. Perkins Research Conference: Petroleum Systems of Deep-Water Basins, 159-192.

Pindell, J. L., Higgs, R. and Dewey, J. F. 1998. Cenozoic palinspastic reconstruction, paleogeographic evolution, and hydrocarbon setting of the northern margin of South America. In: Pindell, J. L. and Drake, C. L. (eds) Paleogeographic Evolution and Non-glacial Eustasy, northern South America. SEPM (Society for Sedimentary Geology), Special Publication, 58, 45-86.

Pindell, J.L., Kennan, L., Stanek, K.P., Maresch, W.V. and Draper, G. 2006. Foundations of GOM and Caribbean evolution: eight controversies resolved. Geologica Acta, 4, 303–341.

## **Plate Tectonics:**

Oceanic Fracture zones:

*These are interpreted from Vertical Gravity Gradient and Aeromagnetic data from our own work and also combined with interpretation from Pindell et al. 2016/2020.*

Pindell, J., Ernesto, M.C., Alejandro, C., and Leopoldo, H. 2016. Aeromagnetic Map Constrains Jurassic-Early Cretaceous Synrift, Break Up, and Rotational Seafloor Spreading History in the Gulf of Mexico. 35th Annual GCSSEPM Foundation Perkins-Rosen Research Conference: Mesozoic of the Gulf Rim and Beyond: New Progress in Science and Exploration of the Gulf of Mexico Basin. December 8-9, 2016, 123-153, CD-ROM CD-ROM. https://doi.org/10.5724/gcs.15.35.0123

Pindell, J., Villagómez, D., Molina-Garza, R., Graham R., and Weber, B., 2020. A revised synthesis of the rift and drift history of the Gulf of Mexico and surrounding regions in the light of improved age dating of the Middle Jurassic salt. Geological Society, London, Special Publications, 504. <https://doi.org/10.1144/SP504-2020-43>

Sandwell, D. T., R. D. Müller, W. H. F. Smith, E. Garcia, R. Francis, 2014. New global marine gravity model from CryoSat-2 and Jason-1 reveals buried tectonic structure, Science, Vol. 346, no. 6205, pp. 65-67. http://dx.doi.org/10.1126/science.1258213

Spreading Centre:

*These are interpreted from Vertical Gravity Gradient and Aeromagnetic data from our own work and also combined with interpretation from Pindell et al. 2016/2020 and Reuber et al. 2019.*

Pindell, J., Ernesto, M.C., Alejandro, C., and Leopoldo, H. 2016. Aeromagnetic Map Constrains Jurassic-Early Cretaceous Synrift, Break Up, and Rotational Seafloor Spreading History in the Gulf of Mexico. 35th Annual GCSSEPM Foundation Perkins-Rosen Research Conference: Mesozoic of the Gulf Rim and Beyond: New Progress in Science and Exploration of the Gulf of Mexico Basin. December 8-9, 2016, 123-153, CD-ROM. <https://doi.org/10.5724/gcs.15.35.0123>

Pindell, J., Villagómez, D., Molina-Garza, R., Graham R., and Weber, B., 2020. A revised synthesis of the rift and drift history of the Gulf of Mexico and surrounding regions in the light of improved age dating of the Middle Jurassic salt. Geological Society, London, Special Publications, 504. <https://doi.org/10.1144/SP504-2020-43>

Reuber, K., Pindell, J., Goswami, A., Campbell, C., Bliss, A. and Horn, B.W. 2019. Character of the Caribbean crust revealed: initial observations of new and reprocessed seismic data. GeoGulf Transactions, 69, 407–414.

The map is provided “as is”, without warranty of any kind, expressed or implied including without limitations, accuracy, omissions, completeness or implied warranties or suitability or fitness for a particular purpose or other incidental damages arising out of the use or the inability to use the map. You acknowledge that the use of this service is entirely at your own risk.
